# Supplementary material for: The oral microbiota of patients with recurrent aphthous stomatitis
Source: PubMed Central journal article supplement — J Oral Microbiol. 2014 Oct 29;6:10.3402/jom.v6.25739. doi: 10.3402/jom.v6.25739 (PMC4221501; doi:10.3402/jom.v6.25739), 2014-10-29
Supplement: JOM-6-25739-s001.pdf [file JOM-6-25739-s001.pdf]

## Supplementary Table

**Supplementary Table 1.** Patients with recurrent aphthous stomatitis (RAS) with regular medication.

| Age (yrs) | Gender (F/M) | Lesion size | Disease                                      | Medication                                         |
|-----------|--------------|-------------|----------------------------------------------|----------------------------------------------------|
| 59        | F            | Minor RAS   | Acid reflux                                  | Omeprazole, Sodium citrate, Sodium bicarbonate     |
| 47        | F            | Minor RAS   | Parkinson´s disease                          | Pramipexole, Ferrous succinate, Fexofenadine       |
| 57        | F            | Minor RAS   | Acid reflux, Sciatica                        | Omeprazole, Ketoprofen, Estradiol                  |
| 40        | M            | Minor RAS   | High blood pressure                          | Enalapril                                          |
| 23        | F            | Minor RAS   | Crohn´s disease, Migraine, Rheumatic disease | Tramadol                                           |
| 57        | F            | Minor RAS   | Asthma, Psoriatic arthritis, Fibromyalgia    | Budesonide, Paracetamol                            |
| 59        | F            | Minor RAS   | Arthritis, Goitre                            | Simvastatin, Estradiol, Medroxyprogesterone        |
| 33        | M            | Minor RAS   | Bechterew´s disease                          | Paracetamol, Diclofenac, Citalopram, Omeprazole    |
| 19        | F            | Minor RAS   | ADHD                                         | Methylphenidate                                    |
| 37        | F            | Minor RAS   | Asthma, Bipolar disorder                     | Budesonide, Lamotrigin, Sertraline                 |
| 17        | F            | Minor RAS   | Ulcerative Colitis                           | Azathioprine, Prednisolone, Mesalazine             |
| 68        | F            | Minor RAS   | Psoriatic arthritis                          | Ibuprofen                                          |
| 35        | F            | Major RAS   | Anxiety                                      | Ephedrine/Caffeine                                 |
| 61        | F            | Major RAS   | Hypothyroidism/Rheumatic disease             | Thalidomide, Levothyroxine, Ibuprofen              |
| 45        | F            | Major RAS   | Systemic Lupus Erythematosus (SLE), Epilepsy | Acetylsalicylic acid, Valproic acid                |
| 59        | F            | Major RAS   | Chronic lung embolism                        | Sildenafil, Warfarin, Citalopram, Omeprazole       |
| 65        | F            | Major RAS   | Arthritis                                    | Diclofenac                                         |
| 23        | M            | Major RAS   | Diabetes type I, Coeliac disease             | Insulin                                            |
| 19        | M            | Major RAS   | Asthma                                       | Budesonide                                         |
| 9         | M            | Major RAS   | Crohn´s disease                              | Sulfasalazin, Methotrexate                         |
| 19        | F            | Major RAS   | Congenital Disorder of Glycosylation         | Carbamazepine, Omeprazole, Levothyroxine, Diazepam |
| 34        | F            | Major RAS   | Depression                                   | Duloxetine                                         |
| 23        | F            | Major RAS   | Asthma                                       | Budesonide                                         |
| 18        | M            | Major RAS   | Asthma                                       | Budesonide                                         |



**Supplementary Figure 1. Variable Influence of Projection (VIP) plot.** The VIP plot depicts the contribution of each X-variable for the model, Partial Least Squares-discriminant analysis (PLS-DA), comparing the buccal microbiota (identified as Terminal-Restriction Fragment Length Polymorphism (T-RFLP) peaks) and the Y-variables, i.e., the study population (identified as patients with RAS and control subjects). The higher the VIP-value, the larger the contribution to the model becomes. X-variables with VIP-values  $\geq 1$  are considered to contribute to the model, whereas X-variables with VIP-values  $\leq 1$  are considered not to contribute significantly, whereby they can be excluded.
